1  
2  
3  
4  
5  
6  
7  
8  
9  
10  
11  
12  
13  
14  
15  
16  
17  
18  
19  
20  
21  
22  
23

Natural genetic variation screen in *Drosophila* identifies Wnt signaling, mitochondrial metabolism, and redox homeostasis genes as modifiers of apoptosis

Rebecca A.S. Palu\*, Elaine Ong\*, Kaitlyn Stevens\*, Shani Chung\*, Katie G. Owings\*, Alan G. Goodman<sup>†,‡</sup>, Clement Y. Chow\*

\*Department of Human Genetics, University of Utah School of Medicine, Salt Lake City, UT 84112

<sup>†</sup>School of Molecular Biosciences, Washington State University College of Veterinary Medicine, Pullman, WA 99164

<sup>‡</sup>Paul G. Allen School for Global Animal Health, Washington State University College of Veterinary Medicine, Pullman, WA 99164

24 **Running title: Natural modifiers of apoptosis**

25 **Key words: apoptosis, *Drosophila*, genetic variation, modifier genes**

26

27 Corresponding author:

28 Clement Y. Chow

29 15 N 2030 E

30 Rm 5200

31 Eccles Institute of Human Genetics

32 Salt Lake City, UT 84112

33 801-585-3314

34 [cchow@genetics.utah.edu](mailto:cchow@genetics.utah.edu)

35

36

## ABSTRACT

37 Apoptosis is the primary cause of degeneration in a number of neuronal, muscular, and  
38 metabolic disorders. These diseases are subject to a great deal of phenotypic  
39 heterogeneity in patient populations, primarily due to differences in genetic variation  
40 between individuals. This creates a barrier to effective diagnosis and treatment.  
41 Understanding how genetic variation influences apoptosis could lead to the  
42 development of new therapeutics and better personalized treatment approaches. In this  
43 study, we examine the impact of the natural genetic variation in the *Drosophila* Genetic  
44 Reference Panel (DGRP) on two models of apoptosis-induced retinal degeneration:  
45 overexpression of *p53* or *reaper* (*rpr*). We identify a number of known apoptotic, neural,  
46 and developmental genes as candidate modifiers of degeneration. We also use Gene

47 Set Enrichment Analysis (GSEA) to identify pathways that harbor genetic variation that  
48 impact these apoptosis models, including Wnt signaling, mitochondrial metabolism, and  
49 redox homeostasis. Finally, we demonstrate that many of these candidates have a  
50 functional effect on apoptosis and degeneration. These studies provide a number of  
51 avenues for modifying genes and pathways of apoptosis-related disease.

52

53

## INTRODUCTION

54 Phenotypic heterogeneity is the driving force behind the Precision Medicine Initiative  
55 (Scriver and Waters 1999; Nadeau 2001; Queitsch *et al.* 2012; Gallati 2014). Patients  
56 suffering from the same genetic disorders can carry identical causal mutations but often  
57 display wildly variable phenotypes and symptom severity. A large part of this variation is  
58 due to inter-individual differences in genetic background, including silent cryptic genetic  
59 variation that is revealed upon disease or stress (Queitsch *et al.* 2012; Chow 2016).  
60 Understanding the role of this variation and the genes or pathways which modify  
61 disease will lead to improved personalized therapeutic predictions, strategies, and  
62 diagnostics.

63

64 One process implicated in many genetic disorders is programmed cell death or  
65 apoptosis (Elmore 2007; Sano and Reed 2013; Kurtishi *et al.* 2018). During normal  
66 development and tissue turnover, cells can receive both internal and external signals  
67 that trigger a programmed response which eventually results in the death of the cell  
68 (Elmore 2007). Because cell death is essential to cellular, tissue, and organismal  
69 homeostasis, disruption of apoptosis pathways can be catastrophic. Inhibition of

70 apoptosis is an important step in transformation and cancer, while excess apoptosis,  
71 often activated by chronic cellular stress, is a primary cause of degeneration in different  
72 neuronal, retinal, muscular-skeletal, and metabolic diseases (Mattson 2000; Elmore  
73 2007; Ouyang *et al.* 2012). As a result, an important area of therapeutic development is  
74 focused on targeting apoptosis without disrupting normal tissue homeostasis (Elmore  
75 2007). Our previous work demonstrated that variation in apoptotic genes is associated  
76 with phenotypic variation in a model of retinal degeneration, suggesting that modifiers of  
77 apoptosis could serve as drug targets in degenerative diseases (Chow *et al.* 2016).

78  
79 Model organism tools, such as the *Drosophila* Genetic Reference Panel (DGRP),  
80 enable the study of the impact of natural genetic variation on diseases and related  
81 pathways. The DGRP is a collection of ~200 isogenic strains derived from a wild  
82 population, such that each strain represents one wild-derived genome (Mackay *et al.*  
83 2012). The variation in the DGRP is well tolerated under healthy, non-disease  
84 conditions and allows for the identification of genetic polymorphisms that are associated  
85 with phenotypic variation in models of human disease (Chow and Reiter 2017).  
86 Importantly, the availability of full-genome sequence for these strains allows for  
87 genome-wide association analyses that link quantitative phenotypes with genetic  
88 variation and modifier genes.

89  
90 In this study, we report the results of natural variation screens of *reaper-* (*rpr*) and *p53-*  
91 induced apoptosis (Figure 1). Overexpression of either of these genes leads to massive  
92 apoptotic activation (Hay *et al.* 1995; Jin *et al.* 2000). While there is a great deal of

93 overlap between these pathways, they can each activate apoptosis independently. p53  
94 is stabilized in response to DNA damage and initiates apoptosis by transcriptionally  
95 activating the inhibitor of apoptosis (IAP) inhibitors *rpr*, *grim*, and *hid* (Mollereau and Ma  
96 2014) (Figure 1). It also induces the expression of the *Drosophila* TNF *eiger*, which  
97 subsequently increases apoptosis by activating JNK signaling and stabilizing the IAP  
98 inhibitor Hid (Shklover *et al.* 2015). *rpr* is activated transcriptionally by either p53 or the  
99 JNK signaling cascade, which is induced downstream of oxidative, ER, and other  
100 cellular stresses (Kanda and Miura 2004; Shlevkov and Morata 2012) (Figure 1). We  
101 designed this study to identify genetic modifiers of general apoptosis as well as  
102 modifiers that are specific to stress-induced, p53-independent pathways.

103

104 We observed substantial phenotypic variation across the DGRP for both *rpr*- and *p53*-  
105 induced apoptosis. Using genome-wide association analysis, we identified a number of  
106 modifying pathways and genes, several of which have known roles in cell death  
107 pathways, neuronal development, neuromuscular diseases, and cancer. Using systems  
108 biology approaches, we also identified Wnt signaling, mitochondrial redox homeostasis,  
109 and protein ubiquitination/degradation as possible modifiers of apoptosis. Finally, we  
110 confirmed that loss of many of these candidate modifier genes significantly alters  
111 degeneration. Our findings highlight several exciting new areas of study for apoptotic  
112 modifiers, as well as a role for stress-induced cell death in the regulation of  
113 degenerative disorders.

114

115

## METHODS

## 116 **Fly stocks and maintenance**

117 Flies were raised at room temperature on a diet based on the Bloomington Stock Center  
118 standard medium with malt. The strains containing *GMR-GAL4* and *UAS-p53* or *GMR-*  
119 *rpr* on the second chromosome (*GMR>p53* and *GMR-rpr*) have been previously  
120 described (Hay *et al.* 1995; Jin *et al.* 2000). These are referred to as the apoptotic  
121 models throughout the manuscript. 204 strains from the DGRP were used for the  
122 *GMR>p53* study (Table S1) and 202 were used for the *GMR-rpr* study (Table S2). In  
123 both cases virgin females carrying one of the apoptosis models were crossed to males  
124 of the DGRP strains. F1 progeny carrying *GMR>p53* or *GMR-rpr* were collected and  
125 scored for eye size. The following RNAi and control strains are from the Bloomington  
126 Stock Center: *swim* RNAi (55961), *CG3032* RNAi (57560), *LysRS* RNAi (32967),  
127 *αMan1a* RNAi (64944), *LIMK1* RNAi (62153), *hay* RNAi (53345), *CG1907* RNAi  
128 (38998), *Sema1a* RNAi (34320), *MED16* RNAi (34012), *bru1* RNAi (44483), *CycE* RNAi  
129 (33645), *shab* RNAi (55682), *CG31559* RNAi (64671), *Cyt-c-P* RNAi (64898), *Ir40A*  
130 (57566), *sif* RNAi (61934), control *attP40* (36304), and control *attP2* (36303).

131

## 132 **Eye size imaging**

133 For eye images, adult females were collected under CO<sub>2</sub> anesthesia and aged to 2-7  
134 days, then flash frozen on dry ice. Left eyes were imaged for all measurements. 10-15  
135 eyes per strain were imaged at 3X magnification using a Leica EC3 camera. Eye area  
136 was measured in ImageJ as previously described (Chow *et al.* 2016).

137

## 138 **Phenotypic analysis and genome-wide association**

139 For each DGRP line, eyes from 10-15 individual females were imaged and measured.  
140 The P-values for association of genetic background and eye size for each model were  
141 calculated using one-way ANOVA on R software. Mean eye area was used for the  
142 genome-wide association (GWA). GWA was performed as previously described (Chow  
143 *et al.* 2016). DGRP genotypes were downloaded from the website,  
144 <http://dgrp.gnets.ncsu.edu/>. Variants were filtered for minor allele frequency ( $\geq 0.05$ ),  
145 and non-biallelic sites were removed. A total of 1,967,719 variants for *p53* and  
146 1,962,205 variants for *rpr* were included in the analysis. Mean eye size for 2953 F1  
147 DGRP/*GMR*>*p53* or 2987 DGRP/*GMR-rpr* F1 progeny were regressed on each SNP.  
148 To account for cryptic relatedness (He *et al.* 2014; Huang *et al.* 2014), GEMMA (v. 0.94)  
149 (Zhou and Stephens 2012) was used to both estimate a centered genetic relatedness  
150 matrix and perform association tests using the following linear mixed model (LMM):

$$151 \quad y = \alpha + x\beta + u + \epsilon$$

$$152 \quad u \sim \text{MVN}_n(0, \lambda \tau^{-1} K)$$

$$153 \quad \epsilon \sim \text{MVN}_n(0, \tau^{-1} I_n)$$

154 where, as described and adapted from Zhou and Stephens 2012,  $y$  is the  $n$ -vector of  
155 mean eye sizes for the  $n$  lines,  $\alpha$  is the intercept,  $x$  is the  $n$ -vector of marker genotypes,  
156  $\beta$  is the effect size of the marker.  $u$  is a  $n \times n$  matrix of random effects with a multivariate  
157 normal distribution ( $\text{MVN}_n$ ) that depends on  $\lambda$ , the ratio between the two variance  
158 components,  $\tau^{-1}$ , the variance of residuals errors, and where the covariance matrix is  
159 informed by  $K$ , the calculated  $n \times n$  marker-based relatedness matrix.  $K$  accounts for all  
160 pairwise non-random sharing of genetic material among lines.  $\epsilon$ , is a  $n$ -vector of  
161 residual errors, with a multivariate normal distribution that depends on  $\tau^{-1}$  and  $I_n$ ,

162 the identity matrix. Genes were identified from SNP coordinates using the BDGP  
163 R54/dm3 genome build. A SNP was assigned to a gene if it was +/- 1 kb from a gene  
164 body.

165

### 166 **Correlation Analysis**

167 Correlation analyses were performed to compare mean eye size in DGRP strains  
168 between *GMR>p53*, *GMR-rpr*, and *GMR>Rh1<sup>G69D</sup>* (Chow *et al.* 2016). Statistics were  
169 calculated using a Pearson Correlation Test using R software.

170

### 171 **RNAi Validation**

172 Virgin females from the apoptotic models were crossed to males carrying RNAi  
173 constructs targeting candidate modifiers of those models, and the eye size of F1  
174 progeny expressing both the apoptotic model and the RNAi construct was measured as  
175 described above. The eyes of 10-15 females were imaged and measured. Eye size  
176 from RNAi-carrying strains were compared directly to genetically matched *attP40* or  
177 *attP2* controls using a Dunnett's multiple comparisons test.

178

### 179 **Bioinformatics Analysis**

180 Genetic polymorphisms were associated with candidate genes within 1 kb of the  
181 polymorphism. Information about candidate genes and their human orthologues was  
182 gathered from a number of databases including Flymine, Flybase, OMIM, and NCBI.  
183 Genetic interaction maps were generated using the GeneMANIA plugin on Cytoscape  
184 (version 3.6.1) (Shannon *et al.* 2003; Montojo *et al.* 2010). GSEA was run to generate a



185 rank-list of genes based on their enrichment for significantly associated polymorphisms.  
186 For GSEA analysis, polymorphisms within 1kb of more than 1 gene were assigned to  
187 one gene based on a priority list of exon, UTR, intron, and upstream or downstream.  
188 Genes were assigned to GO categories, and calculation of enrichment score was  
189 performed as described (Subramanian *et al.* 2005). Categories with ES scores > 0  
190 (enriched for associated genes with low p-values), gene number > 3, and p-values  
191 <0.05 were included in the final output.

192

## 193 RESULTS AND DISCUSSION

### 194 ***rpr*- and *p53*-induced apoptosis is dependent on genetic background**

195 We used the *Drosophila* eye to model apoptosis. Expression of either *p53* or *rpr* in the  
196 ommatidial array of the developing eye imaginal disc results in massive cell death and  
197 smaller, rough adult eyes (Hay *et al.* 1995; Jin *et al.* 2000). The *rpr* model is induced by  
198 direct drive of the *GMR* promoter (*GMR-rpr*) on a second chromosome balancer. The  
199 *p53* model is induced using the *GAL4/UAS* system, where *GMR-GAL4* drives  
200 expression of *UAS-p53* (*GMR>p53*). Importantly, in both of these models, adult eye size  
201 is an easily scorable, quantitative proxy for levels of apoptosis. The lines described  
202 serve as the donor strains (*GMR>p53/CyO* or *GMR-rpr,CyO/sna<sup>SCO</sup>*) that we crossed to  
203 each DGRP strain. Females from the donor strains were crossed with males of each of  
204 204 or 202 DGRP strains to generate F1 progeny that overexpressed *p53* or *rpr*,  
205 respectively, in the eye disc. The progeny received 50% of their genome from the  
206 maternal donor strain and 50% from the paternal DGRP strain. Therefore, we are  
207 measuring the dominant effect of the DGRP background on the *p53* or *rpr* retinal

208 phenotype. This cross design is similar to a study of ER stress-induced degeneration  
209 (Chow *et al.* 2016) and a model of Parkinson's Disease (Lavoy *et al.* 2018) we  
210 previously reported. We examined eye size in the F1 progeny to determine the average  
211 eye size in individual genetic backgrounds (Figure 2A-D).

212  
213 We first tested the effect of sex on apoptosis in a pilot study. We measured eye area in  
214 at least ten females and ten males from eight different DGRP strains crossed to either  
215 the *p53* or *rpr* model. Eye size is positively correlated between males and females  
216 (Figure S1A,B). Because variation is greater in females (Figure S1A,B), we elected to  
217 focus on female eye size for the remainder of our analysis.

218  
219 We found a significant effect of genetic background on eye size in the *GMR>p53* model  
220 ( $P < 2.2 \times 10^{-16}$ ) (Figure 2A,C, Table S1). Average eye size measured in pixels on  
221 ImageJ ranged from 10542 pixels (RAL812) to 17835 pixels (RAL374) (Table S1).  
222 Similarly, we found a significant effect of genetic background on eye size in the *GMR-*  
223 *rpr* model ( $P < 2.2 \times 10^{-16}$ ), with median eye size ranging from 7957 pixels (RAL83) to  
224 16884 pixels (RAL304) (Figure 2B,D, Table S2). For both the *GMR>p53* and the *GMR-*  
225 *rpr* models, the variation in eye size within individual DGRP strains is substantially  
226 smaller than the variation observed between DGRP strains expressing the *GMR-rpr*  
227 model (Figure 2A-B, Table S1-S2).

228  
229 We noted that the range in average eye size for the *GMR-rpr* model (8927 pixels) is  
230 greater than that seen in the *GMR>p53* model (7293 pixels). This could be due to the

231 greater involvement of *rpr* in a variety of stress-induced, *p53*-independent apoptotic  
232 pathways (Shlevkov and Morata 2012). Alternatively, it is possible that variation in *p53*-  
233 associated pathways is simply less well-tolerated than in *rpr*-associated pathways. It is  
234 also possible that the DGRP simply carries more variation affecting the *GMR-rpr* model  
235 than *GMR>p53* model.

236  
237 We observed qualitative differences between the apoptotic models, with flies expressing  
238 the *GMR>p53* model displaying a teardrop-shaped eye (Figure 2C) and flies expressing  
239 the *GMR-rpr* model displaying a rounder eye (Figure 2D). These qualitative shapes  
240 were not subject to effects of genetic variation. The differences in eye shape noted  
241 between *GMR>p53* and *GMR-rpr*, however, could be indicative of differences in the  
242 mechanisms by which apoptosis and degeneration progress in these two models.  
243 Alternatively, this could be evidence of the technical differences in the two models,  
244 since *p53* is driven by the *GAL4/UAS* system and *rpr* is driven directly by the *GMR*  
245 promotor. We saw no accumulation of necrotic tissue in strains experiencing severe  
246 degeneration, nor did we note obvious differences in pigmentation (Figure 2C,D). Eyes  
247 from all strains maintained the rough-eye phenotype that is characteristic of *p53* or *rpr*-  
248 induced degeneration, indicating that while modifying variation may reduce the amount  
249 of cell death in the eye imaginal disc, it cannot fully rescue the degenerative phenotype.

250

### 251 **Apoptosis models correlate depending upon the pathway they activate**

252 Because canonical *p53* signaling activates the expression of *rpr*, we expected high  
253 correlation in apoptosis levels and eye size between these models (Shlevkov and

254 Morata 2012; Mollereau and Ma 2014). Indeed, there is a significant positive correlation  
255 in eye size between DGRP strains expressing *GMR>p53* and *GMR-rpr* ( $r = 0.19$ ,  $p =$   
256  $0.0071$ ) (Figure 3A). In a previous study, we examined the impact of genetic variation  
257 on a model of retinitis pigmentosa (RP) and ER stress-induced apoptosis (Chow *et al.*  
258 2016). In this study, we found that the degeneration induced by overexpression of a  
259 misfolded protein (*Rh1<sup>G69D</sup>*) in the developing eye imaginal disc is modified by a number  
260 of genes involved in apoptosis (Chow *et al.* 2016). This is to be expected, as the  
261 primary cause of degeneration in this model is JNK-*hid/grim/rpr*-mediated cell death  
262 (Figure 1) (Kang *et al.* 2012). Consistent with this mechanism of *Rh1<sup>G69D</sup>*-induced  
263 degeneration, we found a significant correlation in eye size between the *Rh1<sup>G69D</sup>* and *rpr*  
264 models ( $r = 0.25$ ,  $p = 0.001$ , Figure 3B). In contrast, we see no correlation between the  
265 *Rh1<sup>G69D</sup>* and *p53* models of apoptosis ( $r = 0.12$ ,  $p = 0.13$ ) (Figure 3C). These results  
266 suggest that there is shared genetic architecture between *Rh1<sup>G69D</sup>* and *rpr*-mediated  
267 apoptosis and degeneration that is independent from that shared between *p53* and *rpr*.

268

269 ***rpr*-induced degeneration is modified by apoptosis, Wnt signaling, and**  
270 **mitochondrial metabolism**

271 **Genome-wide association analysis:** To identify the genes driving this phenotypic  
272 variability, we performed a genome-wide association analysis to identify genetic  
273 polymorphisms that impact the severity of degeneration in the *GMR>p53* and *GMR-rpr*  
274 models of apoptosis. We used mean eye size as a quantitative phenotype to test for  
275 association with polymorphisms in the DGRP. Using a p-value cutoff of  $<1 \times 10^{-04}$ , we  
276 identified 128 significantly associated polymorphisms for the *GMR-rpr* model (Table S3).

277 We only considered polymorphisms that fall within +/- 1 kb of a gene. Sixteen  
278 polymorphisms lie outside of these parameters and were not considered further. Of the  
279 remaining 112 polymorphisms, ten are located in an intergenic region (+/- 1kb), 14 are  
280 located in UTRs, 69 are located in introns, and 19 are located in protein-coding  
281 sequences. All 19 polymorphisms in coding regions are synonymous variants. These  
282 112 gene-associated polymorphisms lie in 82 candidate genes (Table S3, S4). Sixty-six  
283 of the candidate genes have direct human orthologues (Table S4). A more stringent p-  
284 value cutoff ( $<1 \times 10^{-5}$ ) yields only 20 polymorphisms, 16 of which lie in 14 candidate  
285 genes (12 with human orthologs) (Table S3, S4). Because the more stringent cutoff  
286 yielded few candidates, we focused the majority of our analysis on the 82 candidate  
287 genes identified at  $p < 1 \times 10^{-4}$ .

288

289 For the *GMR>p53* model, we identified 24 polymorphisms at a p-value cutoff of  $<1 \times 10^{-4}$   
290 (Table S5). Eight of these polymorphisms lie outside of genes and were not considered  
291 further. Of the remaining 16 polymorphisms, one is located in a UTR, 15 are located in  
292 introns, and eight are intergenic. The 16 gene-associated polymorphisms lie in 13  
293 candidate genes (Table S5, S6). Thirteen of the associated polymorphisms have a p-  
294 value of  $<1 \times 10^{-5}$ . Five of these are intergenic, while the remaining six are in six  
295 candidate genes. Interestingly, there is no overlap between the *GMR>p53* candidate  
296 polymorphisms or genes and those identified using the *GMR-rpr* model of apoptosis  
297 (Table S3-S6). The only overlap in modifier genes is between *GMR>Rh1<sup>G69D</sup>* and  
298 *GMR>p53* (Table S6) (Chow *et al.* 2016). They share candidate modifier genes  
299 *CG31559*, a disulfide oxidoreductase (FlyBase Curators *et al.* 2004), and *dpr6*, a cell

300 surface immunoglobulin involved in synapse organization (Gaudet *et al.* 2011). It is  
301 unclear what the significance of this overlap might be.

302

303 We conclude from our initial analysis that the top candidates for our models of  
304 degeneration are highly specific to the method by which we induce that degeneration.

305 Because there are so few significant associations for the *GMR>p53* model of apoptosis,  
306 and even fewer that are in close proximity to a candidate gene, we elected to focus the  
307 remaining analysis on the *GMR-rpr* model.

308

309 **Modifier genes:** Because the *rpr* model directly induces apoptosis, we expected to see  
310 apoptotic functions for many of the candidate genes identified in our GWAS. The top hit  
311 was the gene *echinus* (*ec*), a ubiquitin specific protease (USP) orthologous to human  
312 *USP53* and *USP54* (Table S4). We identified nine intronic SNPs in *ec* through our  
313 association analysis. Previous studies show that loss of *ec* in the developing eye results  
314 in a mild rough eye phenotype, albeit a much less dramatic one than that seen upon  
315 overexpression of *rpr* (Wolff and Ready 1991; Copeland *et al.* 2007). While this previous  
316 study reported no genetic interaction between *ec* and *rpr*, this was assessed based on  
317 qualitative changes as opposed to quantitative differences in eye size (Copeland *et al.*  
318 2007). Our GWAS data suggests that such a genetic interaction may play an important  
319 role in *rpr*-induced degeneration.

320

321 *Ec* is one of several apoptotic genes identified in this analysis. In fact, 16/82 (~20%) of  
322 the candidate genes have known functions in apoptosis-related pathways, all of which

323 have conserved human orthologues (Table S4). One of these is *Diap2*, a *Drosophila*  
324 paralog of *Diap1* (human orthologs: *BIRC2* and *BIRC3*) (Hay *et al.* 1995). The Diap  
325 proteins normally inhibit caspase activation and prevent apoptosis. Expression of the  
326 *rpr/grim/hid* proteins inhibits *Diap1* and *Diap2*, allowing apoptosis to proceed. Increased  
327 expression or activity of *Diap2* reduces the impact of *rpr* overexpression, thereby  
328 reducing apoptosis (Hay *et al.* 1995). Conversely, reduced expression of *Diap2* may not  
329 have a strong impact on *rpr*-associated degeneration, as *Diap1* is the major functional  
330 paralog in this pathway. The identification of a gene directly involved in the *rpr* pathway  
331 demonstrates the efficacy of our GWAS.

332

333 Two candidates, *hay* and *Xpd* (*ERCC3* and *ERCC2*) (Table S4), have human orthologs  
334 mutated in Xeroderma pigmentosum, an inherited genetic condition where defects in  
335 DNA excision repair result in melanomas and eventually death (Kraemer and  
336 DiGiovanna 2016). These are subunits of the TFIIH helicase complex that are involved  
337 in excision repair after UV damage (Koken *et al.* 1992; Mounkes *et al.* 1992; Reynaud *et*  
338 *al.* 1999). Besides *hay* and *Xpd*, we identified 4 additional genes whose human  
339 orthologs are directly involved in cancer: *DIP-iota* (*OPCML*), *Fum4* (*FH*), *CG8405*  
340 (*TMEM259*), and *CG15529* (*BLNK*). Mutations in these genes have been associated  
341 with ovarian cancer (*OPCML*) (Sellar *et al.* 2003), renal cancer (*FH*) (The Multiple  
342 Leiomyoma Consortium 2002; Pollard *et al.* 2005), and various carcinomas (*TMEM259*)  
343 (Chen *et al.* 2005). The roles of these genes in cancer are likely due to functions in  
344 apoptotic initiation or cell cycle regulation. Other candidates are activated downstream  
345 of p53, such as *CG44153* (*ADGRB3*) and *stac* (*BAIAP3*) (Shiratsuchi *et al.* 1997, 1998).

346 This suggests that feedback signaling through p53 can increase *rpr*-induced apoptosis  
347 and degeneration.

348

349 24/82 candidate genes (~30%) are involved in neuronal function or implicated in  
350 neurological disease. Twenty-three have conserved human orthologues (Table S4).  
351 Human orthologs of *Form3* (*INF2*) and *LysRS* (*KARS*) can both be mutated in different  
352 forms of the degenerative peripheral neuropathy Charcot-Marie-Tooth disease  
353 (McLaughlin *et al.* 2010; Boyer *et al.* 2011), while *Shawl* (*KCNC3*) and *CG7741*  
354 (*CWF19L1*) are associated with spinocerebellar ataxia (Waters *et al.* 2006; Burns *et al.*  
355 2014). Mutation in the Rab3-interacting scaffold protein encoded by *Rim* (*RIMS1*) can  
356 cause a retinal degenerative disease that is similar to retinitis pigmentosa (Johnson *et*  
357 *al.* 2003), which was the focus of the *Rh1*<sup>G69D</sup> study (Chow *et al.* 2016). Identification of  
358 genes with roles in different neuronal and muscular degenerative diseases suggests  
359 that these modifiers could be important in a variety of apoptosis-associated diseases.

360

361 **Network analysis:** To understand if there are functional relationships between *GMR-rpr*  
362 modifiers, we examined interactions among the 82 candidate genes. Genetic, physical,  
363 and predicted interactions were compiled and visualized using Cytoscape software  
364 (Shannon *et al.* 2003; Montojo *et al.* 2010). Fourteen of the 82 candidate genes were  
365 found as nodes in these interaction networks, as was *rpr* itself (Figure 4A). We identified  
366 several interesting clusters of candidate genes, including those with functions in  
367 apoptosis, development, and protein ubiquitination.

368



369 As expected, given the large number of candidates with apoptotic roles, we found an  
370 apoptosis cluster of interactions between modifiers with functions associated with cell  
371 cycle regulation and cell death (Figure 4A). A number of these genes, including *Diap2*  
372 and *cher* (*FLNA*), have either direct or indirect interactions with *rpr* itself. As noted  
373 above, *Diap2* interacts both physically and genetically with *rpr* (Figure 1) (Hay *et al.*  
374 1995). *cher* shows indirect genetic interactions with *rpr* through its physical association  
375 with the presenillin (*psn*) protein (Guo *et al.* 2000) (Figure 4A). This interaction is  
376 conserved in humans and is specifically associated with Alzheimer's Disease (Lu *et al.*  
377 2010).

378

379 We also observed a cluster composed of regulators of developmental apoptosis in our  
380 network, including the *ec* protease (Copeland *et al.* 2007) and the neuronal cell  
381 adhesion protein encoded by *kirre* (*KIRREL3*) (Bao *et al.* 2010) (Figure 4A). Indirect  
382 genetic interactions were identified between these genes, which are commonly involved  
383 in development of the *Drosophila* eye imaginal disc and accompanying regulated  
384 apoptosis. The chromatin-binding HmgD/Z (*HMGB2*) proteins are expressed at high  
385 levels in the larval CNS, suggesting that they are important for the developmental  
386 regulation of neuronal gene expression (Churchill *et al.* 1995; Gaudet *et al.* 2011; Brown  
387 *et al.* 2014). They indirectly interact with *rpr* through the closely related *dsp1*, which  
388 encodes another paralog of human *HMGB2* (Figure 4A). Dsp1 recruits members of the  
389 repressive polycomb complex to chromatin. It is possible that these genetic interactions  
390 indicate a role for the *HMGB2* proteins in regulating *rpr* expression and, as a result,  
391 developmental regulation of cell death and tissue turnover. Our apoptotic model is

392 expressed in a developmental tissue, suggesting that some of the variation in eye size  
393 observed across the DGRP could be due to changes in the response of developmental  
394 processes to the abnormal activation of apoptosis. Such regulators of developmental  
395 apoptosis could be excellent candidates for therapeutic targeting in degenerative  
396 diseases.

397

398 We also identified a number of predicted interactions in a cluster of modifier genes  
399 involved in protein ubiquitination (Figure 4A). Among the top candidate genes are *ec*,  
400 *Diap2*, *Su(dx)* (*ITCH*), and *Roc2* (*RNF7*), all of which have important roles in protein  
401 degradation through ubiquitination and the proteasome degradation pathway. *Su(dx)*,  
402 like *Diap2*, encodes a ubiquitin ligase (Gaudet *et al.* 2011). Our network analysis  
403 highlights a predicted interaction between *Su(dx)* and the Rab GTPase-interacting  
404 protein *Evi5*, another candidate gene (Laflamme *et al.* 2012) (Figure 4A). This regulator  
405 of vesicular fusion is predicted to interact with a number of additional ubiquitin ligases  
406 as well (Figure 4A). Degradation of proteins through the proteasome is an important  
407 mechanism for maintaining cellular homeostasis under a variety of cellular stresses  
408 (Sano and Reed 2013). Altered regulation of E3 ligases, which determine the identity  
409 and specificity of proteins for degradation (Ester Morreale and Walden 2016), could tip  
410 the balance of cells experiencing apoptotic stress toward or away from cell death.

411

412 **Gene set enrichment analysis:** Thus far, we have focused our analysis on rank-order  
413 candidate modifiers identified in our GWAS. While this provides many new avenues for  
414 future analysis, it ignores the majority of the association data. We therefore performed

415 gene set enrichment analysis (GSEA), using all GWAS variant data and their associated  
416 P-values. The gene nearest to each variant was assigned the variant's P-value and  
417 used as GSEA input, using the method described (Subramanian *et al.* 2005). Given a  
418 defined set of genes annotated with a certain GO function, GSEA determines whether  
419 the members of that set are randomly distributed throughout the ranked list or if they are  
420 found primarily at the top or bottom of that list. GO categories enriched at the top of the  
421 list functionally describe the phenotype of the gene set. While traditional GO analysis  
422 uses a set of genes based on a P-value cutoff, GSEA examines the entire gene set  
423 (Dyer *et al.* 2008). GSEA identified 62 significantly associated gene sets ( $\geq 3$  genes) at  
424 a p-value of  $<0.05$  (Table S7). The top gene set was synaptogenesis (GO:0007416,  $P =$   
425  $3.7 \times 10^{-3}$ ) and includes *Sema1a* (*SEMA6A*), a conserved semaphorin-binding protein  
426 involved in axon guidance (Ayoob *et al.* 2006; Gaudet *et al.* 2011) and one of the top  
427 modifier candidates based on individual polymorphism analysis (Figure 4B, Table S7).  
428 Other genes in this category include those involved in synapse formation and  
429 organization, suggesting that regulating neuronal connectivity and synapse choice could  
430 play a role in the decision to apoptose or to survive.

431  
432 The second most significantly enriched category was Wnt signaling (GO:0016055,  $P =$   
433  $6.7 \times 10^{-3}$ ), consisting of 51 enriched genes from our *GMR-rpr* analysis (Figure 4B,  
434 Table S7). One of these, *arr*, is also a candidate modifier gene (Table S4,S7). *arr* is a  
435 *Drosophila* orthologue of the genes encoding the co-receptors *LRP5/6* in canonical Wnt  
436 signaling (Rives *et al.* 2006). The second most significant single candidate gene in the  
437 GWA is *swim* (*TINAGL1/TINAG*), a secreted cysteine protease capable of binding the

438 wingless (*wg*) ligand and enhancing its spread and signaling capabilities (Mulligan *et al.*  
439 2012). Also enriched for significant polymorphisms are four frizzled paralogs (Wnt  
440 receptors) and six paralogs of the Wnt ligand (Table S7). Other integral components of  
441 the canonical Wnt pathway, such as *disheveled*, *axin*, and *CK1a*, are enriched for  
442 associated polymorphisms, as are several peripheral and non-canonical regulators of  
443 Wnt signaling (Table S7). This striking association is reinforced by previous studies that  
444 have linked Wnt signaling with either the promotion or restraint of cell death (Pećina-  
445 Slaus 2010). Non-canonical Wnt signaling can activate JNK or calcium release from the  
446 ER, both of which can alter the decision to initiate apoptosis (Rasmussen *et al.* 2018). It  
447 will be interesting to investigate Wnt signaling collectively as well as with individual  
448 candidates to determine how different branches of the pathway impact degenerative  
449 diseases.

450  
451 GSEA also identified a number of genes and pathways involved in mitochondrial  
452 homeostasis and metabolism (Figure 4B), including malate metabolic processes (seven  
453 genes, GO:0006108,  $P = 0.011$ ). These genes encode for malate dehydrogenase  
454 enzymes, six of which are localized to the mitochondrion (Figure 4B, Table S7). Malate  
455 dehydrogenase catalyzes the oxidation of malate to oxaloacetate in the last step of the  
456 TCA cycle prior to the entrance of acetyl-CoA (Minárik *et al.* 2002). The presence of so  
457 many paralogs of this enzyme suggests that mitochondrial metabolism, and in particular  
458 the mitochondrial redox state, is a major regulator of apoptosis. Supporting this, one of  
459 the top candidates, Fum4 (*FH*), is also an essential enzyme in the TCA cycle (Table  
460 S4). The GSEA further supports this finding, as FAD binding is also enriched (48 genes,

461 GO:0050660, P = 0.020) (Figure 4B). A primary function for these 48 enriched genes is  
462 the maintenance of redox homeostasis, 16 of which localize to the mitochondria.  
463 Another of these genes, the apoptosis-inducing factor *AIF*, is activated independently  
464 from caspases by mitochondrial stress and is released into the cytoplasm, travels to the  
465 nucleus, and initiates the chromatin condensation and DNA fragmentation that  
466 immediately precedes cell death (Elmore 2007).

467  
468 More generally, redox homeostasis in other cellular compartments is also implicated by  
469 GSEA (Table S7, Figure 4B). Three paralogs of aldehyde oxidase (*Aox*) and the  
470 NAD(P)H oxidoreductase *Duox* (*DUOX1*) are enriched for associated polymorphisms;  
471 these oxidase enzymes are essential for maintaining an appropriate balance of reactive  
472 oxygen species in the cytoplasm. We identified four paralogs of acyl-coA oxidase  
473 (*Acox*), which is involved in the  $\beta$ -oxidation of very long chain fatty acids in the  
474 peroxisome, and an additional 4 genes involved in mitochondrial  $\beta$ -oxidation: *wal*  
475 (*ETFA*), *Mcad* (*ACADM*), *CG4860* (*ACADS*), and *CG7461* (*ACADVL*).

476  
477 The involvement of enzymes regulating redox homeostasis, and more specifically redox  
478 homeostasis in the mitochondria, is consistent with *rpr*-induced apoptosis. Both  
479 caspase-dependent and caspase-independent apoptotic pathways can be activated  
480 downstream of mitochondrial stress (Elmore 2007; Rasmussen *et al.* 2018). Increasing  
481 the permeability of the mitochondrial membrane is sufficient to ensure activation of the  
482 apoptosome through the release of cytochrome-C (Elmore 2007). This, along with  
483 expression of the mitochondria-associated IAP inhibitors *rpr/grim/hid*, activates the

484 caspase cascade (Sandu *et al.* 2010). Damage to the mitochondria that increases  
485 permeability, such as through redox stress, is itself sufficient to activate apoptosis in a  
486 caspase-independent manner through the release of AIF (Elmore 2007).

487

488 Other metabolic processes such as sterol transport (GO:0015918, P = 0.013), leucine  
489 import (GO:0060356, P =  $8.9 \times 10^{-3}$ ), and fat body development (GO:0007503, P =  
490 0.011) are enriched in the GSEA (Table S7, Figure 4B). Disruption of metabolic  
491 processes has long been known to induce oxidative and ER stress, both of which are  
492 capable of activating apoptosis through JNK/*grm-rpr-hid* signaling cascades or directly  
493 through mitochondrial stress (Kanda and Miura 2004). It will be interesting to explore  
494 how these metabolic processes alter apoptosis not only in this model of retinal  
495 degeneration, but in physiologically relevant cell types and tissues, such as the midgut,  
496 fat body, and insulin-producing cells.

497

498 The enrichment of multiple metabolic categories suggests that the impact of cellular and  
499 mitochondrial metabolism on redox homeostasis could play a major role in *rpr*-induced  
500 degeneration. We hypothesize that these regulators of mitochondrial redox state and  
501 metabolism are directly and indirectly influencing the activation of mitochondrial proteins  
502 involved in the final decision to undergo apoptosis. Our GSEA emphasizes the  
503 importance of exploring not just individually associated genes but also their functional  
504 pathways and partners when identifying genetic modifiers of disease.

505

506 **Functional analysis of candidate modifiers of apoptosis**

507 To confirm the roles of our candidate genes in regulating apoptosis, we elected to test  
508 the impact of loss of modifier expression for nine of the most significant rank-ordered  
509 candidate genes. We crossed RNAi targeting each of these modifiers into the *GMR-rpr*  
510 or *GMR>p53* line, and then measured the eye area in offspring carrying both the RNAi  
511 construct and the apoptosis model (Figure 5, Figure S2). Eye area was quantified and  
512 compared to a genetically matched control expressing only the apoptosis model (Figure  
513 S3A). Due to a lack of highly significant candidate modifiers of *p53*-induced apoptosis,  
514 we focus our analysis here on the *rpr* modifiers. Knockdown of either *LIMK1* (*LIMK1*)  
515 ( $16183 \pm 875$  pixels, N = 15) or *swim* expression ( $15518 \pm 2418$  pixels, N = 14) resulted  
516 in enhancement of the apoptosis phenotype, showing a significant decrease in eye size  
517 compared to controls expressing only *GMR-rpr* ( $17534 \pm 1098$  pixels, N = 11) (Figure  
518 5). Knockdown of *sema1a* ( $18990 \pm 746$  pixels, N = 15), *MED16* (*MED16*) ( $20323 \pm 622$   
519 pixels, N = 15), or *hay* ( $20240 \pm 617$  pixels, N = 14) resulted in a partial rescue, with a  
520 significant increase in eye size compared to controls expressing *GMR-rpr* (Figure 5). No  
521 significant change in eye size was observed upon knockdown of *CG3032* (*GZF1*)  
522 ( $18525 \pm 449$  pixels, N = 12), *LysRS* (*KARS*) ( $17879 \pm 1834$  pixels, N = 12),  *$\alpha$ Man-1A*  
523 (*MAN1A2*) ( $17842 \pm 763$  pixels, N = 15), or *CG1907* (*SLC25A11*) ( $18755 \pm 787$  pixels,  
524 N = 13) (Figure 5). No phenotype was observed for knockdown of any of the modifiers  
525 under non-apoptosis conditions (Figure S3B,C). These results demonstrate that many  
526 of the top GWA candidate modifiers are capable of modifying the apoptotic phenotypes  
527 associated with the *GMR-rpr* model of degeneration. In the future we will also examine  
528 the impact of overexpression of candidate genes on the *GMR-rpr* model of apoptosis,

529 as some candidate genes may exert a stronger influence under conditions of gain rather  
530 than loss of function.

531

## 532 **CONCLUSIONS**

533 The primary goal of this study was to identify candidate genes and pathways that modify  
534 apoptosis and degenerative processes. Apoptosis is a primary cause of disease in a  
535 multitude of degenerative disorders (Mattson 2000). It is also a commonly targeted  
536 pathway for cancer therapies (Ouyang *et al.* 2012). These and other diseases are  
537 subject to a large degree of phenotypic heterogeneity due to inter-individual differences  
538 in genetic background among patients (Queitsch *et al.* 2012; Chow 2016).  
539 Understanding how genetic diversity in the population impacts apoptosis could therefore  
540 lead to identification of prognostic predictors in the diagnosis of disease and of new  
541 therapeutic targets. The modifiers identified here inform our understanding of cell death  
542 regulation and could serve as therapeutic targets in a variety of apoptosis-related  
543 disorders.

544

545 This study demonstrates the use of the DGRP to identify modifiers that are extremely  
546 specific to the disease model being tested. Even though the end point of degeneration  
547 is superficially the same for *rpr* and *p53* models, candidate modifier genes are unique to  
548 each model. Our methods clearly identify genetic variation associated with specific  
549 disease mechanisms, and not simply genes involved in general cell health and survival.  
550 We believe the modifying genes and pathways discovered and discussed here are  
551 excellent candidates in the treatment and understanding of apoptosis-related disorders.



552 With further analysis, we can characterize the roles these modifiers play in degeneration  
553 and their specific functions across tissues and disease models. The genes and  
554 pathways identified study have tremendous value as possible therapeutic targets or  
555 prognostic markers of disease.

556

557

## ACKNOWLEDGEMENTS

558 We thank Andre Cruz and Demi Perez for their contributions to this project. This  
559 research was supported by an NIH/NIGMS R35 award (1R35GM124780) and a Glenn  
560 Award from the Glenn Foundation for Medical Research to CYC. CYC is the Mario R.  
561 Capecchi Endowed Chair in Genetics. RASP is supported by a NIDDK T32 fellowship  
562 (5T32DK110966). KGO is supported by the Genetics T32 Fellowship from the  
563 University of Utah. EO and KS were supported by the Undergraduate Research  
564 Opportunities Program (UROP) through the University of Utah Office of Undergraduate  
565 Research. AGG is supported by an NIH/NIAID R21 award (R21AI128103).

566

567

## REFERENCES

- 568 Ayoob J. C., J. R. Terman, and A. L. Kolodkin, 2006 *Drosophila* Plexin B is a Sema-2a  
569 receptor required for axon guidance. *Development* 133: 2125–35.  
570 <https://doi.org/10.1242/dev.02380>
- 571 Bao S., K.-F. Fischbach, V. Corbin, and R. L. Cagan, 2010 Preferential adhesion  
572 maintains separation of ommatidia in the *Drosophila* eye. *Dev. Biol.* 344: 948–956.  
573 <https://doi.org/10.1016/J.YDBIO.2010.06.013>
- 574 Boyer O., F. Nevo, E. Plaisier, B. Funalot, O. Gribouval, *et al.*, 2011 *INF2* Mutations in  
575 Charcot–Marie–Tooth Disease with Glomerulopathy. *N. Engl. J. Med.* 365: 2377–  
576 2388. <https://doi.org/10.1056/NEJMoa1109122>
- 577 Brown J. B., N. Boley, R. Eisman, G. E. May, M. H. Stoiber, *et al.*, 2014 Diversity and  
578 dynamics of the *Drosophila* transcriptome. *Nature* 512: 393–399.  
579 <https://doi.org/10.1038/nature12962>

- 580 Burns R., K. Majczenko, J. Xu, W. Peng, Z. Yapici, *et al.*, 2014 Homozygous splice  
581 mutation in CWF19L1 in a Turkish family with recessive ataxia syndrome.  
582 *Neurology* 83: 2175–82. <https://doi.org/10.1212/WNL.0000000000001053>
- 583 Chen Y.-C., B. Davidson, C.-C. Cheng, A. Maitra, R. L. Giuntoli, *et al.*, 2005  
584 Identification and characterization of membralin, a novel tumor-associated gene, in  
585 ovarian carcinoma. *Biochim. Biophys. Acta - Gene Struct. Expr.* 1730: 96–102.  
586 <https://doi.org/10.1016/J.BBAEXP.2005.06.008>
- 587 Chow C. Y., 2016 Bringing genetic background into focus. *Nat. Rev. Genet.* 17: 63–64.  
588 <https://doi.org/10.1038/nrg.2015.9>
- 589 Chow C. Y., K. J. P. Kelsey, M. F. Wolfner, and A. G. Clark, 2016 Candidate genetic  
590 modifiers of retinitis pigmentosa identified by exploiting natural variation in  
591 *Drosophila*. *Hum. Mol. Genet.* 25: 651–659. <https://doi.org/10.1093/HMG/DDV502>
- 592 Chow C. Y., and L. T. Reiter, 2017 Etiology of Human Genetic Disease on the Fly.  
593 *Trends Genet.* 33: 391–398. <https://doi.org/10.1016/j.tig.2017.03.007>
- 594 Churchill M. E., D. N. Jones, T. Glaser, H. Hefner, M. A. Searles, *et al.*, 1995 HMG-D is  
595 an architecture-specific protein that preferentially binds to DNA containing the  
596 dinucleotide TG. *EMBO J.* 14: 1264–75.
- 597 Copeland J. M., I. Bosdet, J. D. Freeman, M. Guo, S. M. Gorski, *et al.*, 2007 echinus,  
598 required for interommatidial cell sorting and cell death in the *Drosophila* pupal  
599 retina, encodes a protein with homology to ubiquitin-specific proteases. *BMC Dev.*  
600 *Biol.* 7: 1–15. <https://doi.org/10.1186/1471-213X-7-82>
- 601 Dyer M. D., T. M. Murali, and B. W. Sobral, 2008 The Landscape of Human Proteins  
602 Interacting with Viruses and Other Pathogens. *PLoS Pathog.* 4: e32.  
603 <https://doi.org/10.1371/journal.ppat.0040032>
- 604 Elmore S., 2007 Apoptosis: a review of programmed cell death. *Toxicol. Pathol.* 35:  
605 495–516. <https://doi.org/10.1080/01926230701320337>
- 606 Ester Morreale F., and H. Walden, 2016 Types of Ubiquitin Ligases.  
607 <https://doi.org/10.1016/j.cell.2016.03.003>
- 608 FlyBase Curators, Swiss-Prot Project Members, and InterPro Project Members, 2004  
609 Gene Ontology annotation in FlyBase through association of InterPro records with  
610 GO terms.
- 611 Gallati S., 2014 Disease-modifying genes and monogenic disorders: experience in  
612 cystic fibrosis. *Appl Clin Genet* 7: 133–146. <https://doi.org/10.2147/TACG.S18675>
- 613 Gaudet P., M. Livstone, and P. Thomas, 2011 Gene Ontology annotation inferences  
614 using phylogenetic trees. *GO Reference Genome Project. Brief. Bioinform.* 12:  
615 449–462.

- 616 Guo Y., S. X. Zhang, N. Sokol, L. Cooley, and G. L. Boulianne, 2000 Physical and  
617 genetic interaction of filamin with presenilin in *Drosophila*. *J. Cell Sci.* 113.
- 618 Hay B. A., D. A. Wassarman, and G. M. Rubin, 1995 *Drosophila* homologs of  
619 baculovirus inhibitor of apoptosis proteins function to block cell death. *Cell* 83:  
620 1253–1262. [https://doi.org/10.1016/0092-8674\(95\)90150-7](https://doi.org/10.1016/0092-8674(95)90150-7)
- 621 He B. Z., M. Z. Ludwig, D. A. Dickerson, L. Barse, B. Arun, *et al.*, 2014 Effect of Genetic  
622 Variation in a *Drosophila* Model of Diabetes-Associated Misfolded Human  
623 Proinsulin. *Genetics* 196: 557–567. <https://doi.org/10.1534/genetics.113.157800>
- 624 Huang W., A. Massouras, Y. Inoue, J. Peiffer, M. Ràmia, *et al.*, 2014 Natural variation in  
625 genome architecture among 205 *Drosophila melanogaster* Genetic Reference  
626 Panel lines. *Genome Res.* 24: 1193–208. <https://doi.org/10.1101/gr.171546.113>
- 627 Jin S., S. Martinek, W. S. Joo, J. R. Wortman, N. Mirkovic, *et al.*, 2000 *Identification and*  
628 *characterization of a p53 homologue in Drosophila melanogaster*. *National*  
629 *Academy of Sciences*.
- 630 Johnson S., S. Halford, A. G. Morris, R. J. Patel, S. E. Wilkie, *et al.*, 2003 Genomic  
631 organisation and alternative splicing of human RIM1, a gene implicated in  
632 autosomal dominant cone-rod dystrophy (CORD7). *Genomics* 81: 304–314.  
633 [https://doi.org/10.1016/S0888-7543\(03\)00010-7](https://doi.org/10.1016/S0888-7543(03)00010-7)
- 634 Kanda H., and M. Miura, 2004 Regulatory Roles of JNK in Programmed Cell Death. *J.*  
635 *Biochem.* 136: 1–6. <https://doi.org/10.1093/jb/mvh098>
- 636 Kang M. J., J. Chung, and H. D. Ryoo, 2012 CDK5 and MEKK1 mediate pro-apoptotic  
637 signalling following endoplasmic reticulum stress in an autosomal dominant retinitis  
638 pigmentosa model. *Nat. Cell Biol.* 14: 409–415. <https://doi.org/10.1038/ncb2447>
- 639 Koken M. H. M., C. Vreeken, S. A. M. Bol, N. C. Cheng, I. Jaspers-Dekker, *et al.*, 1992  
640 Cloning and characterization of the *Drosophila* homolog of the xeroderma  
641 pigmentosum complementation-group B correcting gene, *ERCC3*. *Nucleic Acids*  
642 *Res.* 20: 5541–5548. <https://doi.org/10.1093/nar/20.21.5541>
- 643 Kraemer K. H., and J. J. DiGiovanna, 2016 Xeroderma Pigmentosum
- 644 Kurtishi A., B. Rosen, K. S. Patil, G. W. Alves, and S. G. Møller, 2018 Cellular  
645 Proteostasis in Neurodegeneration. *Mol. Neurobiol.* [https://doi.org/10.1007/s12035-](https://doi.org/10.1007/s12035-018-1334-z)  
646 [018-1334-z](https://doi.org/10.1007/s12035-018-1334-z)
- 647 Laflamme C., G. Assaker, D. Ramel, J. F. Dorn, D. She, *et al.*, 2012 Evi5 promotes  
648 collective cell migration through its Rab-GAP activity. *J. Cell Biol.* 198: 57–67.  
649 <https://doi.org/10.1083/jcb.201112114>
- 650 Lavoy S., V. G. Chittoor-Vinod, C. Y. Chow, and I. Martin, 2018 Genetic Modifiers of  
651 Neurodegeneration in a *Drosophila* Model of Parkinson’s Disease. *Genetics* 209:  
652 1345–1356. <https://doi.org/10.1534/genetics.118.301119>

- 653 Lu Q., K. Ding, M. P. Frosch, S. Jones, M. Wolfe, *et al.*, 2010 Alzheimer's disease-  
654 linked presenilin mutation (PS1M146L) induces filamin expression and  $\gamma$ -secretase  
655 independent redistribution. *J. Alzheimers. Dis.* 22: 235–45.  
656 <https://doi.org/10.3233/JAD-2010-100585>
- 657 Mackay T. F. C., S. Richards, E. A. Stone, A. Barbadilla, J. F. Ayroles, *et al.*, 2012 The  
658 *Drosophila melanogaster* Genetic Reference Panel. *Nature* 482: 173–178.  
659 <https://doi.org/10.1038/nature10811>
- 660 Mattson M. P., 2000 Apoptosis in neurodegenerative disorders. *Nat. Rev. Mol. Cell Biol.*  
661 1: 120–130. <https://doi.org/10.1038/35040009>
- 662 McLaughlin H. M., R. Sakaguchi, C. Liu, T. Igarashi, D. Pehlivan, *et al.*, 2010  
663 Compound Heterozygosity for Loss-of-Function Lysyl-tRNA Synthetase Mutations  
664 in a Patient with Peripheral Neuropathy. *Am. J. Hum. Genet.* 87: 560–566.  
665 <https://doi.org/10.1016/J.AJHG.2010.09.008>
- 666 Minárik P., N. Tomášková, M. Kollárová, and M. Antalík, 2002 *Malate Dehydrogenases-*  
667 *Structure and Function.*
- 668 Mollereau B., and D. Ma, 2014 The p53 control of apoptosis and proliferation: lessons  
669 from *Drosophila*. *Apoptosis* 19: 1421–9. <https://doi.org/10.1007/s10495-014-1035-7>
- 670 Montojo J., K. Zuberi, H. Rodriguez, F. Kazi, G. Wright, *et al.*, 2010 GeneMANIA  
671 Cytoscape plugin: fast gene function predictions on the desktop. *Bioinformatics* 26:  
672 2927–8. <https://doi.org/10.1093/bioinformatics/btq562>
- 673 Mounkes L. C., R. S. Jones, B.-C. Liang, W. Gelbart, and M. T. Fuller, 1992 A  
674 *Drosophila* model for xeroderma pigmentosum and Cockayne's syndrome: haywire  
675 encodes the fly homolog of ERCC3, a human excision repair gene. *Cell* 71: 925–  
676 937. [https://doi.org/10.1016/0092-8674\(92\)90389-T](https://doi.org/10.1016/0092-8674(92)90389-T)
- 677 Mulligan K. A., C. Fuerer, W. Ching, M. Fish, K. Willert, *et al.*, 2012 Secreted Wingless-  
678 interacting molecule (Swim) promotes long-range signaling by maintaining  
679 Wingless solubility. *Proc. Natl. Acad. Sci. U. S. A.* 109: 370–7.  
680 <https://doi.org/10.1073/pnas.1119197109>
- 681 Nadeau J. H., 2001 Modifier genes in mice and humans. *Nat Rev Genet* 2: 165–174.  
682 <https://doi.org/10.1038/35056009>
- 683 Ouyang L., Z. Shi, S. Zhao, F.-T. Wang, T.-T. Zhou, *et al.*, 2012 Programmed cell death  
684 pathways in cancer: a review of apoptosis, autophagy and programmed necrosis.  
685 *Cell Prolif.* 45: 487–498. <https://doi.org/10.1111/j.1365-2184.2012.00845.x>
- 686 Pečina-Slaus N., 2010 Wnt signal transduction pathway and apoptosis: a review.  
687 *Cancer Cell Int.* 10: 22. <https://doi.org/10.1186/1475-2867-10-22>
- 688 Pollard P. J., J. J. Brière, N. A. Alam, J. Barwell, E. Barclay, *et al.*, 2005 Accumulation of  
689 Krebs cycle intermediates and over-expression of HIF1 $\alpha$  in tumours which result

- 690 from germline FH and SDH mutations. *Hum. Mol. Genet.* 14: 2231–2239.  
691 <https://doi.org/10.1093/hmg/ddi227>
- 692 Queitsch C., K. D. Carlson, and S. Girirajan, 2012 Lessons from model organisms:  
693 phenotypic robustness and missing heritability in complex disease. *PLoS Genet* 8:  
694 e1003041. <https://doi.org/10.1371/journal.pgen.1003041>
- 695 Rasmussen M., N. Ortolano, A. Romero-Morales, V. Gama, M. L. Rasmussen, *et al.*,  
696 2018 Wnt Signaling and Its Impact on Mitochondrial and Cell Cycle Dynamics in  
697 Pluripotent Stem Cells. *Genes (Basel)*. 9: 109.  
698 <https://doi.org/10.3390/genes9020109>
- 699 Reynaud E., H. Lomelí, M. Vázquez, and M. Zurita, 1999 The *Drosophila melanogaster*  
700 Homologue of the Xeroderma Pigmentosum D Gene Product Is Located in  
701 Euchromatic Regions and Has a Dynamic Response to UV Light-induced Lesions  
702 in Polytene Chromosomes, (E. H. Blackburn, Ed.). *Mol. Biol. Cell* 10: 1191–1203.  
703 <https://doi.org/10.1091/mbc.10.4.1191>
- 704 Rives A. F., K. M. Rochlin, M. Wehrli, S. L. Schwartz, and S. DiNardo, 2006 Endocytic  
705 trafficking of Wingless and its receptors, Arrow and DFrizzled-2, in the *Drosophila*  
706 wing. *Dev. Biol.* 293: 268–283. <https://doi.org/10.1016/J.YDBIO.2006.02.006>
- 707 Sandu C., H. D. Ryoo, and H. Steller, 2010 *Drosophila* IAP antagonists form multimeric  
708 complexes to promote cell death. *J. Cell Biol.* 190: 1039–52.  
709 <https://doi.org/10.1083/jcb.201004086>
- 710 Sano R., and J. C. Reed, 2013 ER stress-induced cell death mechanisms. *Biochim*  
711 *Biophys Acta* 1833: 3460–3470. <https://doi.org/10.1016/j.bbamcr.2013.06.028>
- 712 Scriver C. R., and P. J. Waters, 1999 Monogenic traits are not simple: lessons from  
713 phenylketonuria. *Trends Genet* 15: 267–272.
- 714 Sellar G. C., K. P. Watt, G. J. Rabiasz, E. A. Stronach, L. Li, *et al.*, 2003 OPCML at  
715 11q25 is epigenetically inactivated and has tumor-suppressor function in epithelial  
716 ovarian cancer. *Nat. Genet.* 34: 337–343. <https://doi.org/10.1038/ng1183>
- 717 Shannon P., A. Markiel, O. Ozier, N. S. Baliga, J. T. Wang, *et al.*, 2003 Cytoscape: a  
718 software environment for integrated models of biomolecular interaction networks.  
719 *Genome Res.* 13: 2498–504. <https://doi.org/10.1101/gr.1239303>
- 720 Shiratsuchi T., H. Nishimori, H. Ichise, Y. Nakamura, and T. Tokino, 1997 Cloning and  
721 characterization of BAI2 and BAI3, novel genes homologous to brain-specific  
722 angiogenesis inhibitor 1 (BAM). *Cytogenet. Genome Res.* 79: 103–108.  
723 <https://doi.org/10.1159/000134693>
- 724 Shiratsuchi T., K. Oda, H. Nishimori, M. Suzuki, E. Takahashi, *et al.*, 1998 Cloning and  
725 Characterization of BAP3 (BAI-Associated Protein 3), a C2 Domain-Containing  
726 Protein That Interacts with BAI1. *Biochem. Biophys. Res. Commun.* 251: 158–165.  
727 <https://doi.org/10.1006/BBRC.1998.9408>

- 728 Shklover J., F. Levy-Adam, and E. Kurant, 2015 The role of Drosophila TNF Eiger in  
729 developmental and damage-induced neuronal apoptosis. FEBS Lett. 589: 871–879.  
730 <https://doi.org/10.1016/j.febslet.2015.02.032>
- 731 Shlevkov E., and G. Morata, 2012 A dp53/JNK-dependant feedback amplification loop  
732 is essential for the apoptotic response to stress in Drosophila. Cell Death Differ. 19:  
733 451–460. <https://doi.org/10.1038/cdd.2011.113>
- 734 Subramanian A., P. Tamayo, V. K. Mootha, S. Mukherjee, B. L. Ebert, *et al.*, 2005 Gene  
735 set enrichment analysis: a knowledge-based approach for interpreting genome-  
736 wide expression profiles. Proc. Natl. Acad. Sci. U. S. A. 102: 15545–50.  
737 <https://doi.org/10.1073/pnas.0506580102>
- 738 The Multiple Leiomyoma Consortium, 2002 Germline mutations in FH predispose to  
739 dominantly inherited uterine fibroids, skin leiomyomata and papillary renal cell  
740 cancer. Nat. Genet. 30: 406–410. <https://doi.org/10.1038/ng849>
- 741 Waters M. F., N. A. Minassian, G. Stevanin, K. P. Figueroa, J. P. A. Bannister, *et al.*,  
742 2006 Mutations in voltage-gated potassium channel KCNC3 cause degenerative  
743 and developmental central nervous system phenotypes. Nat. Genet. 38: 447–451.  
744 <https://doi.org/10.1038/ng1758>
- 745 Wolff T., and D. F. Ready, 1991 Cell death in normal and rough eye mutants of  
746 Drosophila. Development 113: 825–839. <https://doi.org/8223268>
- 747 Zhou X., and M. Stephens, 2012 Genome-wide efficient mixed-model analysis for  
748 association studies. Nat. Genet. 44: 821–4. <https://doi.org/10.1038/ng.2310>

749

750

## FIGURE LEGENDS

### 751 **Figure 1. Activation of apoptosis through p53 and rpr-associated pathways.**

752 Apoptosis is primarily initiated through either p53 or Jun-induced (JNK) transcriptional  
753 activation of the Inhibitor of Apoptosis (IAP, in *Drosophila* Diap) inhibitors *hid*, *rpr* and  
754 *grim*. While p53 is primarily activated by DNA damage and disruption of the cell cycle,  
755 JNK signaling is activated downstream of cellular stress, such as endoplasmic reticulum  
756 (ER) stress, through Ire1 and Cdk5. ER stress occurs when misfolding proteins, like the  
757 rhodopsin mutant *Rh1*<sup>G69D</sup>, accumulate in the ER (Chow *et al.* 2016). Expression of *rpr*,  
758 *grim*, and *hid* leads to inhibition of Diap1, releasing the inhibition on initiator caspases

759 and allows for the activation of effector caspases and downstream apoptosis. Models  
760 used in this or previous studies of retinal degeneration in the DGRP are indicated in  
761 white.

762

763 **Figure 2. Apoptosis levels vary across genetic background in *p53* and *rpr* models**  
764 **of apoptosis-induced degeneration.**

765 Apoptosis induced by overexpression of *p53* (**A**) or *rpr* (**B**), as measured by adult eye  
766 size, varies across different genetic backgrounds. DGRP strains are arranged along the  
767 X-axis from smallest to largest (median eye size  $\pm$  standard deviation). Representative  
768 images of *GMR>p53* eyes (**C**) or *GMR-rpr* eyes (**D**) in different DGRP backgrounds  
769 demonstrate the phenotypic variation quantified in panels **A** and **B**.

770

771 **Figure 3. Eye size is correlated between *GMR-rpr* and both *GMR>p53* and**  
772 ***GMR>Rh1<sup>G69D</sup>* models of degeneration.**

773 Correlation in mean eye size between the *GMR-rpr*, *GMR>p53*, and *GMR>Rh1<sup>G69D</sup>*  
774 models across the DGRP. **A.** Eye size is significantly correlated in the same DGRP  
775 strains expressing *GMR-rpr* and *GMR>p53* ( $r = 0.19$ ,  $P = 0.0071$ ). **B.** Eye size is  
776 significantly correlated in the same DGRP strains expressing *GMR-rpr* and  
777 *GMR>Rh1<sup>G69D</sup>* ( $r = 0.25$ ,  $P = 0.001$ ). **C.** Eye size is not correlated in same DGRP strains  
778 expressing *GMR>p53* and *GMR>Rh1<sup>G69D</sup>* ( $r = 0.12$ ,  $P = 0.13$ ). \*  $P < 0.05$ , \*\*  $P < 0.005$ .

779

780 **Figure 4. *rpr* modifiers are enriched for neuronal function, Wnt signaling, and**  
781 **metabolic pathways.**

782 **A.** *rpr* modifier network, as plotted by the GeneMANIA plugin in Cytoscape (Shannon *et*  
783 *al.* 2003; Montojo *et al.* 2010). Significant candidate modifiers are indicated in red, with  
784 physical interactions shown in green, genetic interactions shown in blue, and predicted  
785 interactions shown in gray. Circles represent groups with a functional identifier. **B.** Top  
786 20 significant ontological categories as identified by GSEA. Categories are arranged  
787 from most significant on top to least significant along the y-axis. P-values are indicated  
788 by red-to-blue gradient, with red the lowest p-values and blue the highest P-values.  
789 Gene number identified in each category is indicated along the y-axis.

790

791 **Figure 5. Knockdown of candidate *rpr* modifiers significantly alters apoptosis-**  
792 **induced degeneration.**

793 RNAi against candidate modifiers was expressed under the control of *GMR-GAL4* in the  
794 *GMR-rpr* model. The genetically matched attP2 line was crossed into the *GMR-rpr* line  
795 as a control (blue). Eye size in pixels was quantified for N = 11-15 flies per strain and  
796 plotted with the 25<sup>th</sup>-75<sup>th</sup> percentile of measurements in the central box. Measurements  
797 lying outside of 1.5 x interquartile range are indicated as points. Representative images  
798 of each line are found above the data for that line. Knockdown of *LIMK1* or *swim*  
799 significantly reduces eye size in the *GMR-rpr* model of degeneration compared to  
800 controls. Loss of *Sema1a*, *MED16*, or *hay* results in a significant increase in eye size  
801 compared to controls. Loss of *CG1907* does not significantly alter eye size, but changes  
802 in pigmentation are similar in the presence or absence of *GMR-rpr* (SUPP FIG). Loss of  
803 *αManA1*, *LysRS*, or *CG3032* do not produce a significant effect. RNAi lines with



804 significant changes in eye size are indicated in red, while those that are not significantly  
805 changed are indicated in white. \*  $P < 0.05$ , \*\*\*  $P < 0.0005$ .

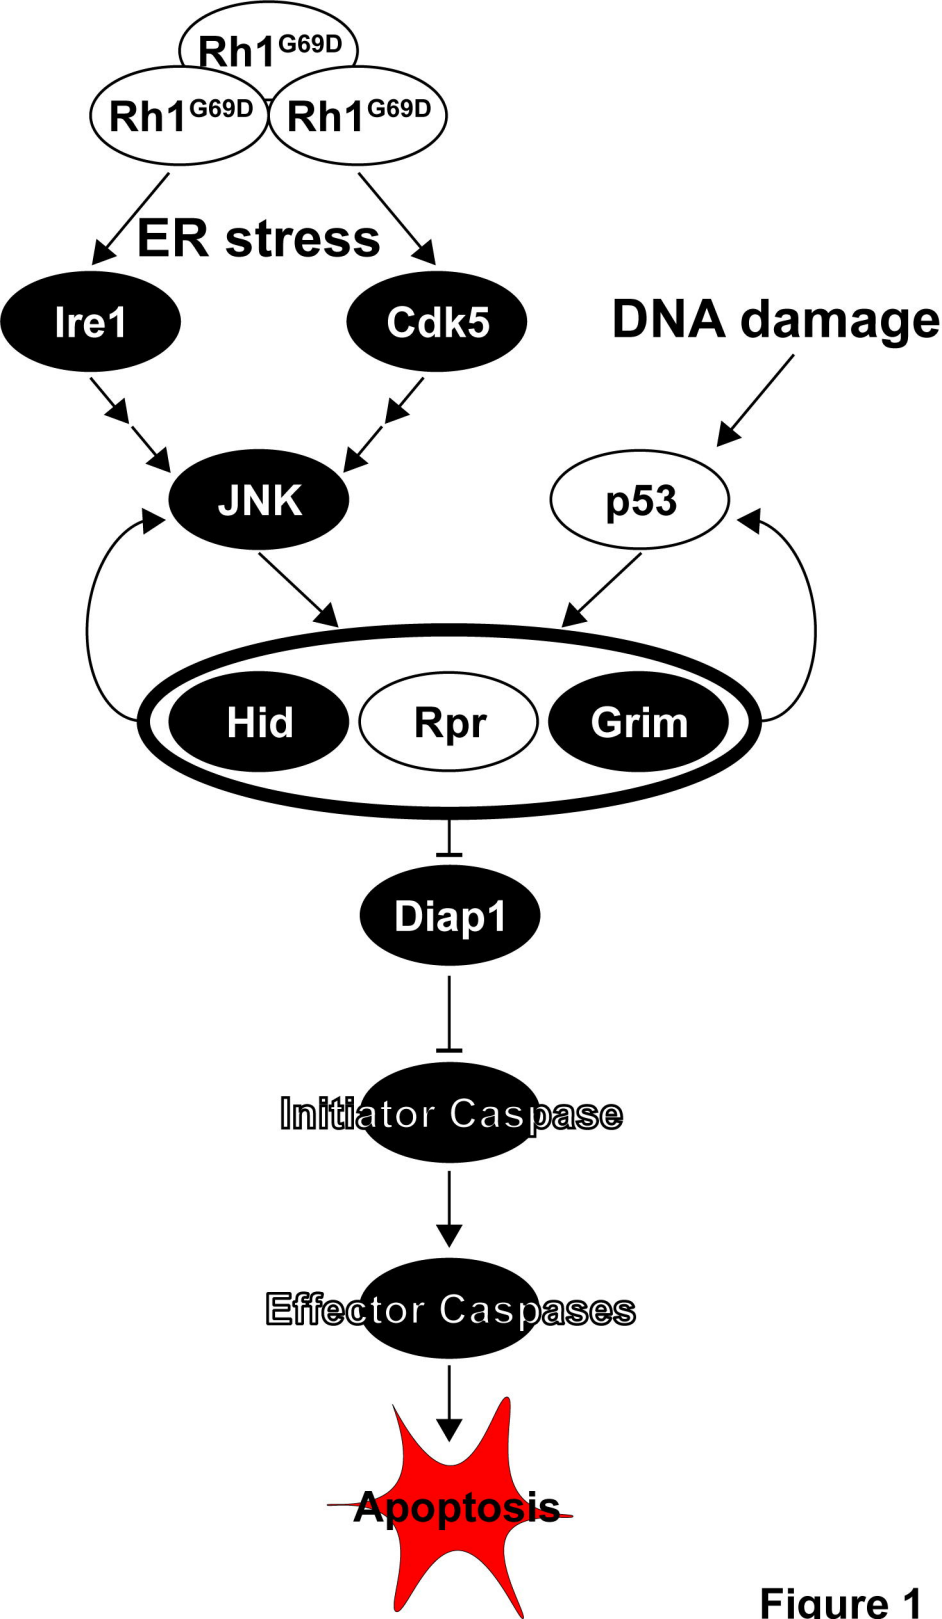

Figure 1

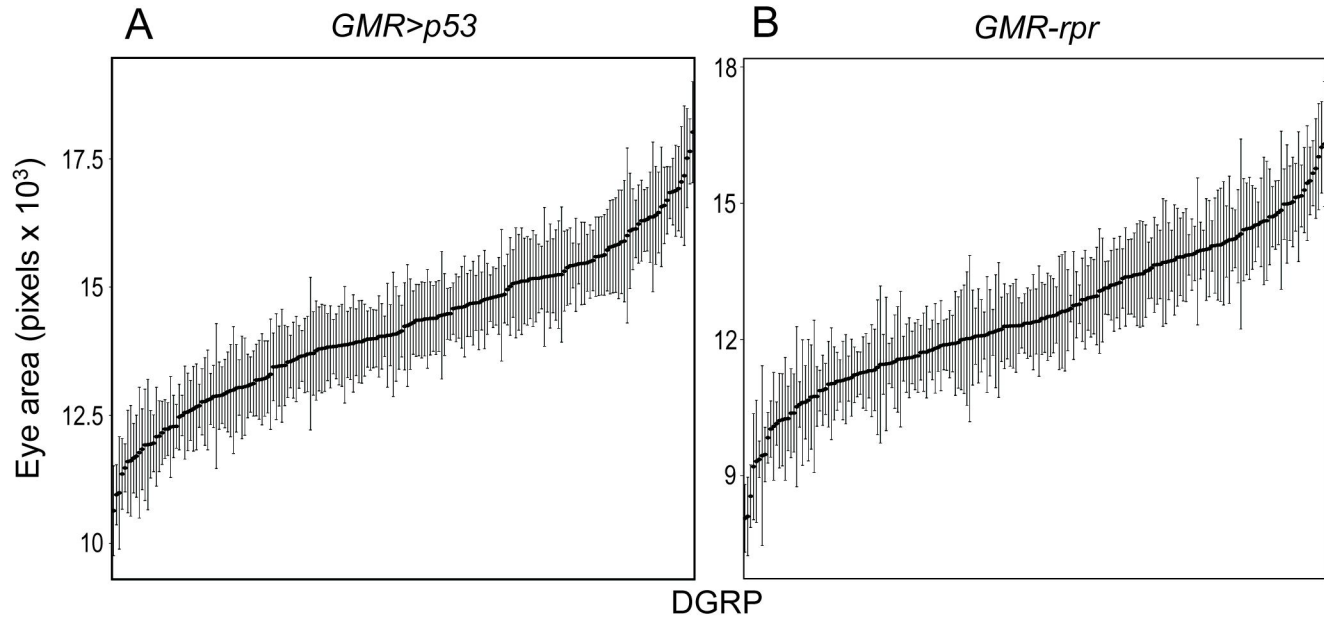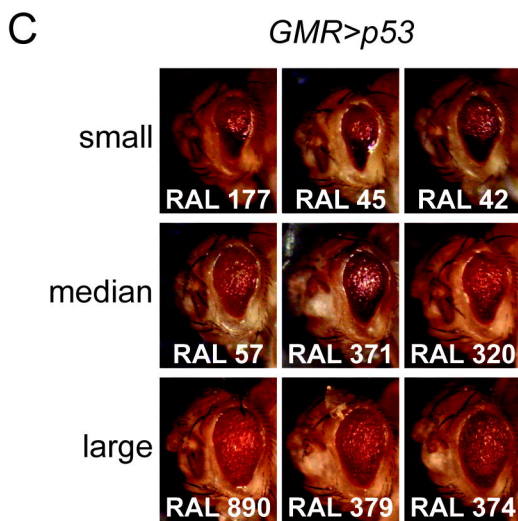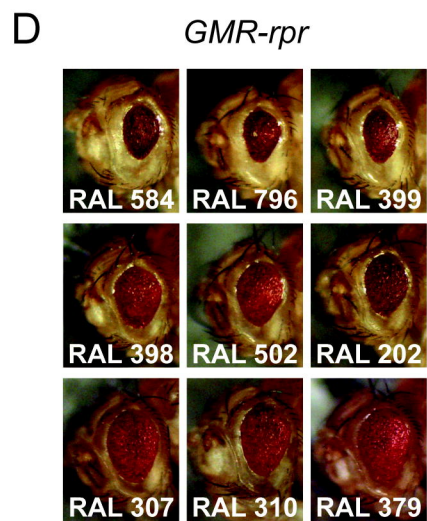

**Figure 2**

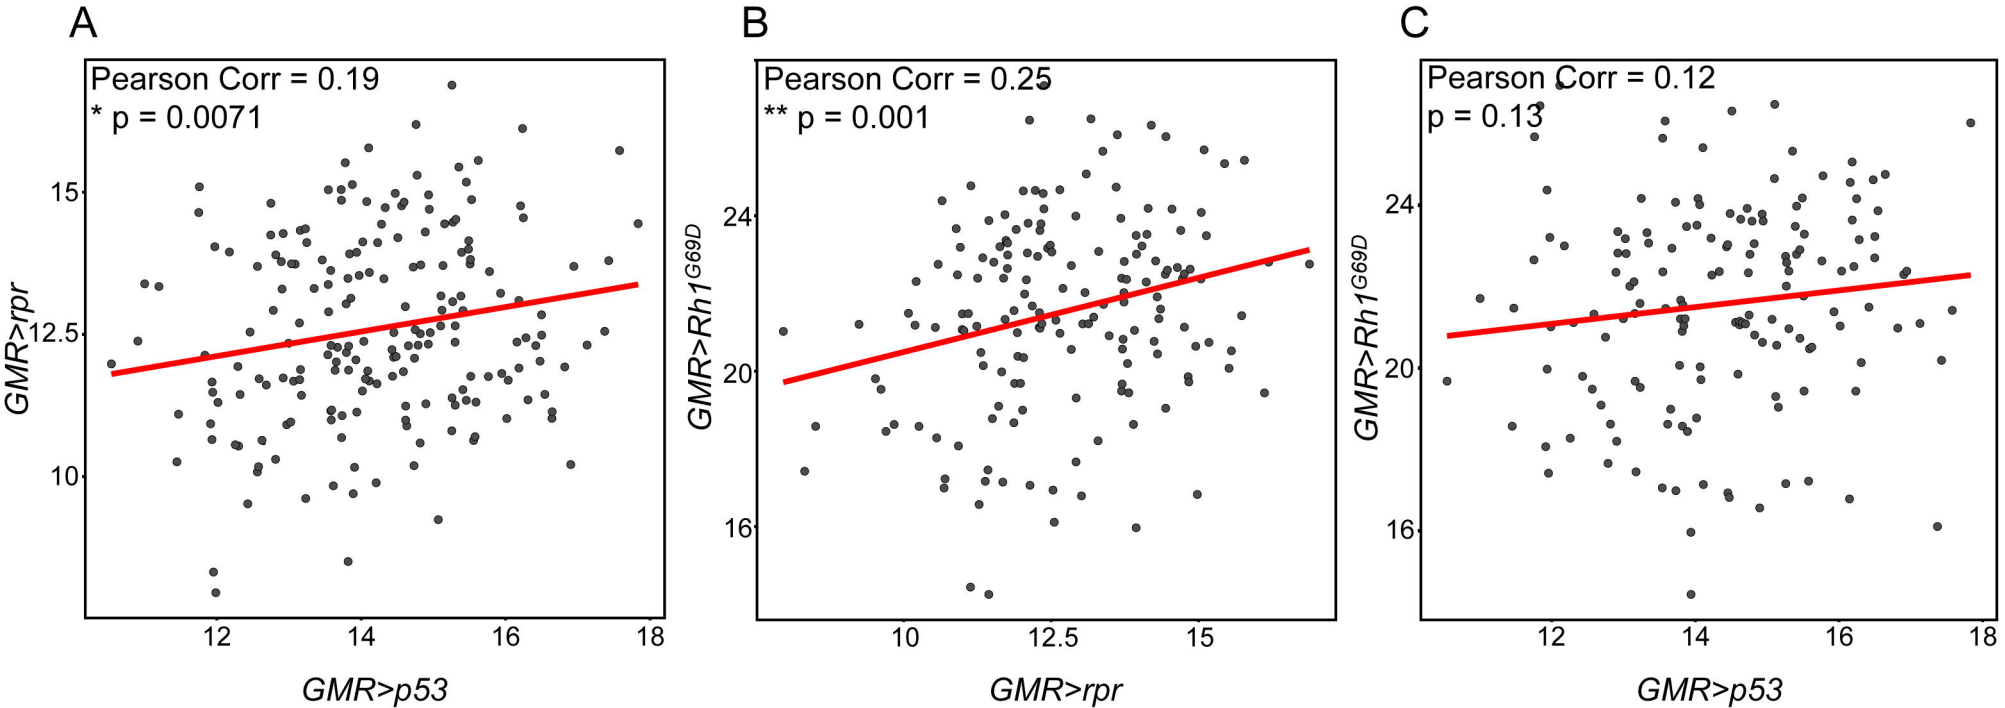

**Figure 3**

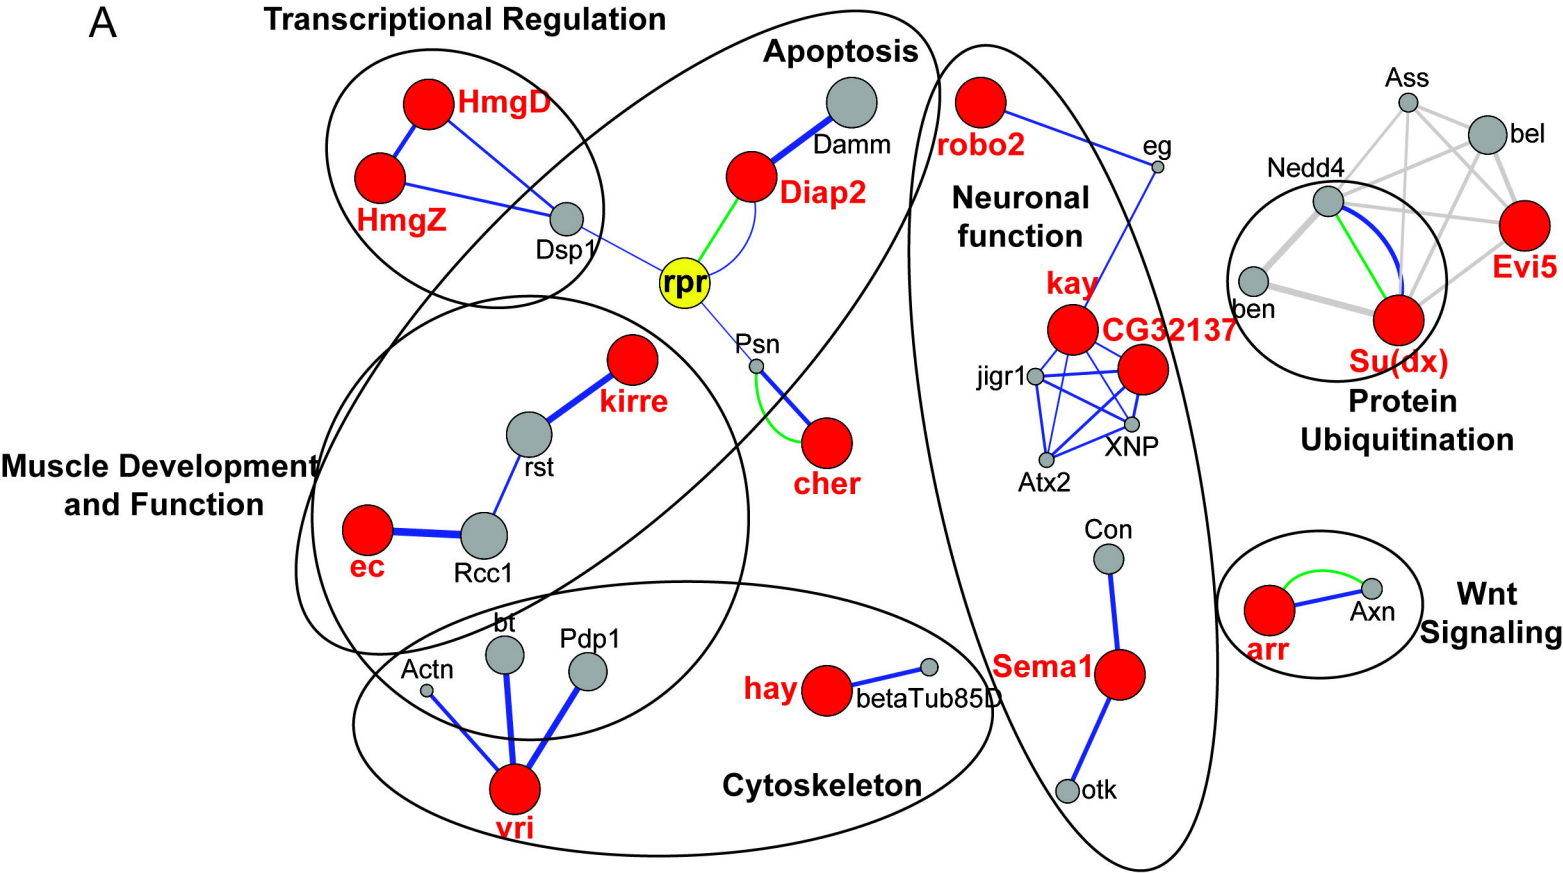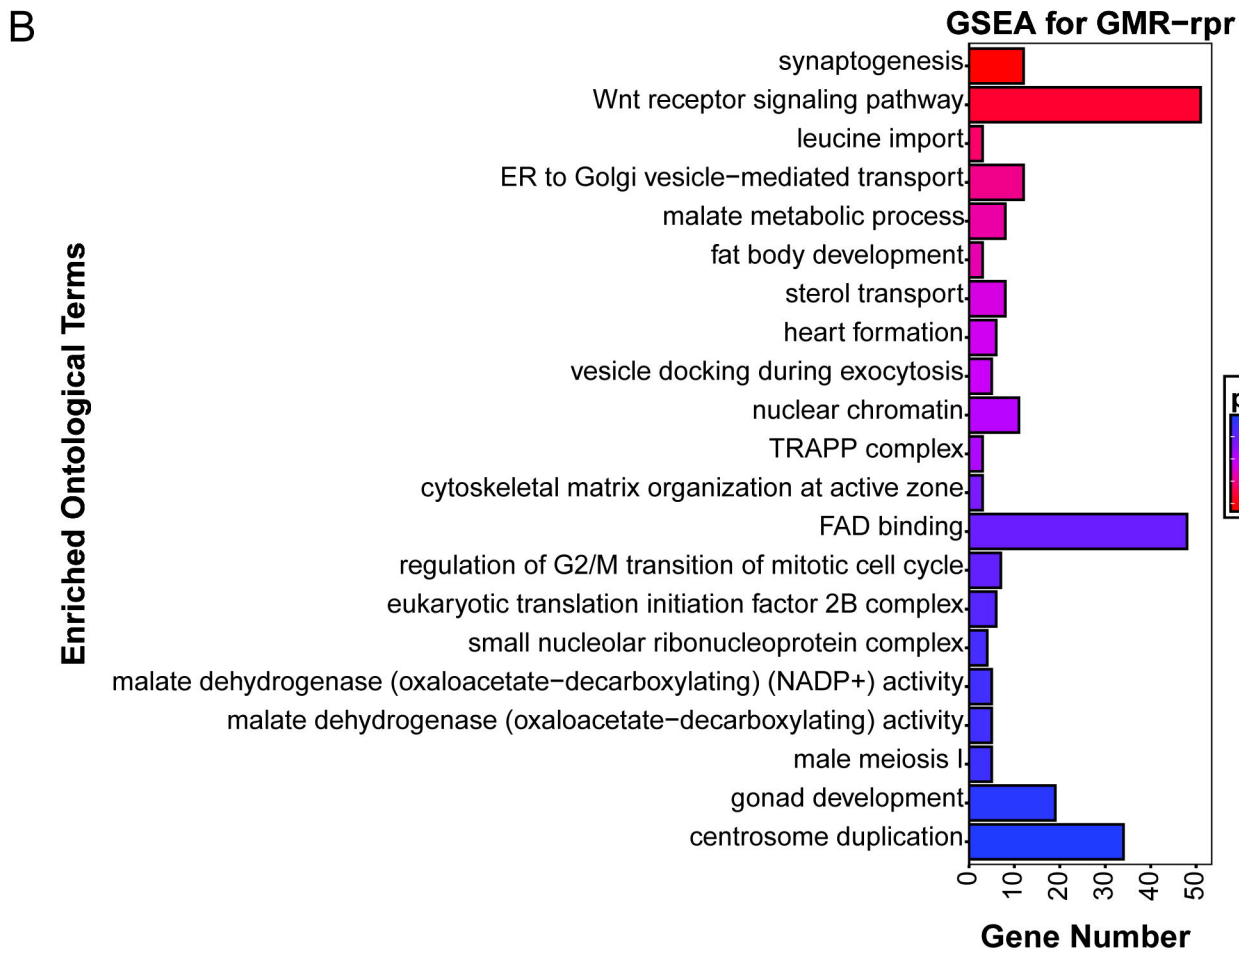

**Figure 4**

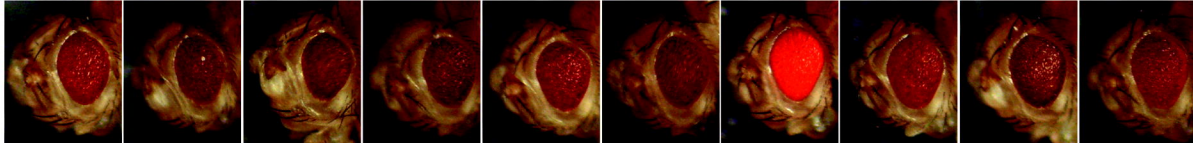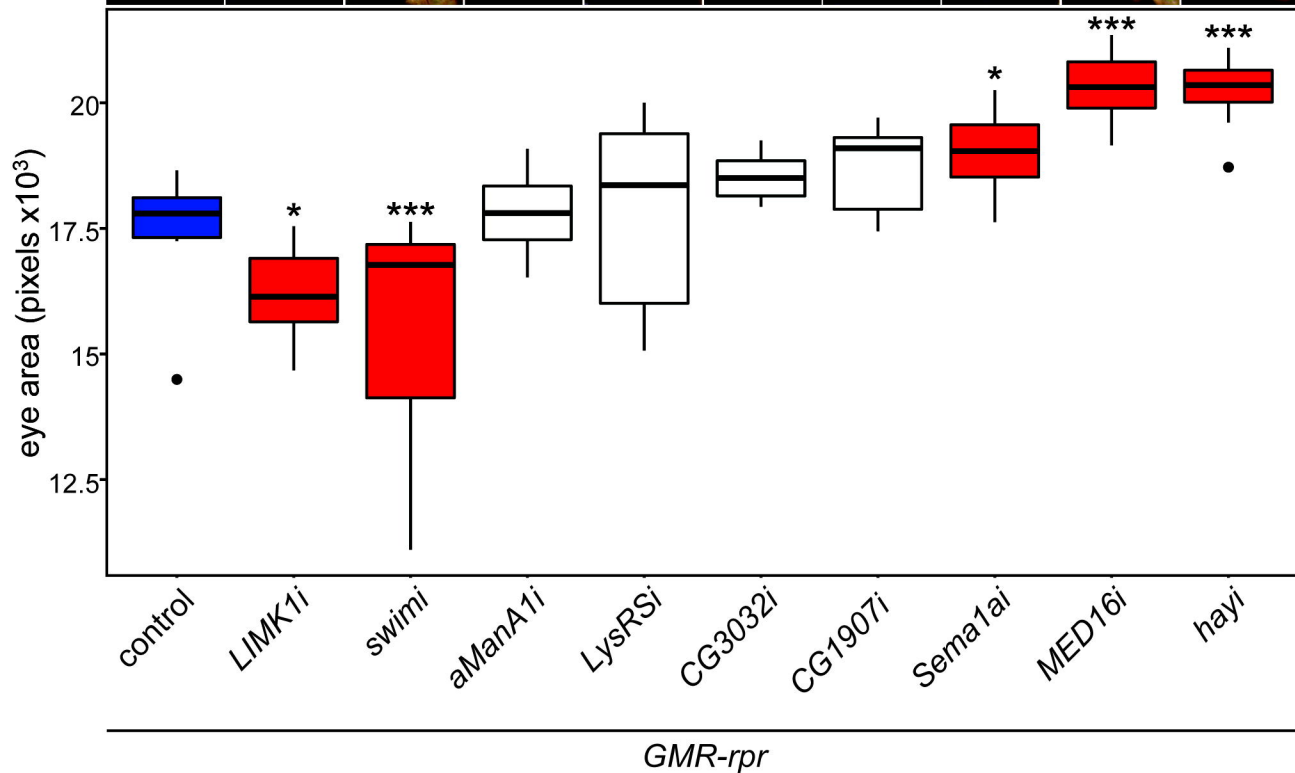

Figure 5
